# Supplementary material
Source: PubMed Central journal article supplement (PMC1500993)
Supplement: 7601190s1.pdf [file 7601190s1.pdf]

**A**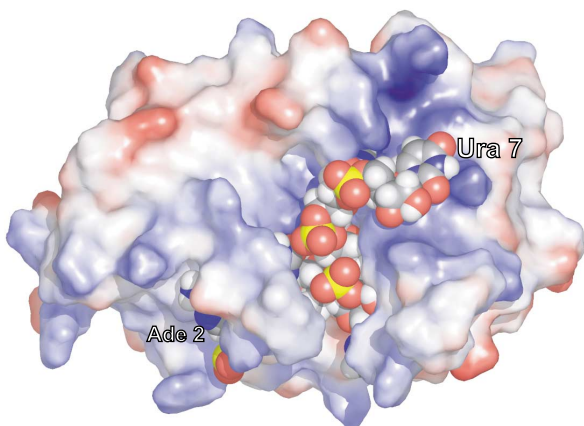**B**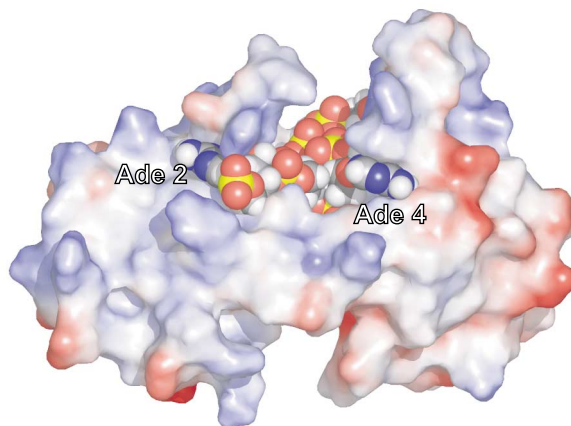

**Supplementary Figure 1:** Formation of the protein-RNA complex defines a highly positive and deep cleft that accommodates the RNA oligo nucleotide. Electrostatic potential has been calculated with the APBS program (Baker et al., 2001) and mapped into the surface of the Hrp1 RNA binding domain. Blue and red colours indicate positively and negatively charged areas respectively. The RNA molecule has been depicted as spheres model representing individual atoms colour-coded by atom type (protons in white, carbons in grey, nitrogens in blue, oxygens in red and phosphorous in yellow). Most of the ribose and base moieties are highly buried into the protein structure while the hydrophilic phosphate backbone appears highly exposed. A detail of the Ade2 and Ade4 binding pockets is shown on the left panel.

Baker, N.A., Sept, D., Joseph, S., Holst, M.J. and McCammon, J.A. (2001)  
Electrostatics of nanosystems: application to microtubules and the ribosome.  
Proc Natl Acad Sci U S A, 98, 10037-10041.
