# Supplementary material
Source: PubMed Central journal article supplement (PMC1500993)
Supplement: 7601190s3.pdf [file 7601190s3.pdf]

**A**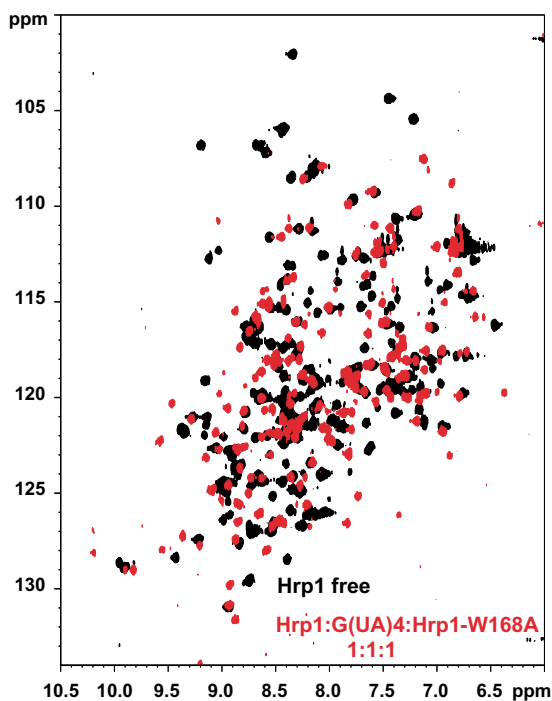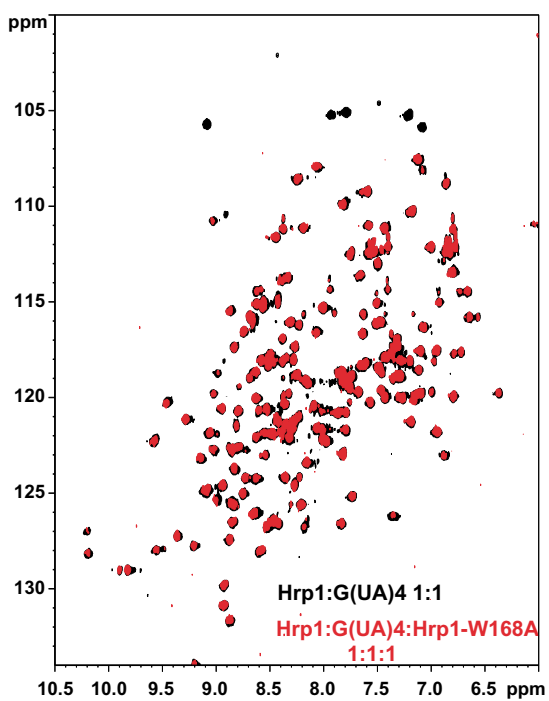**B**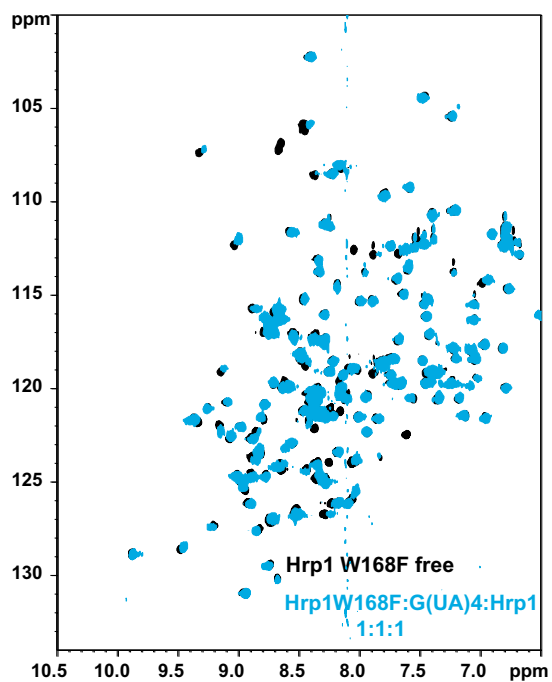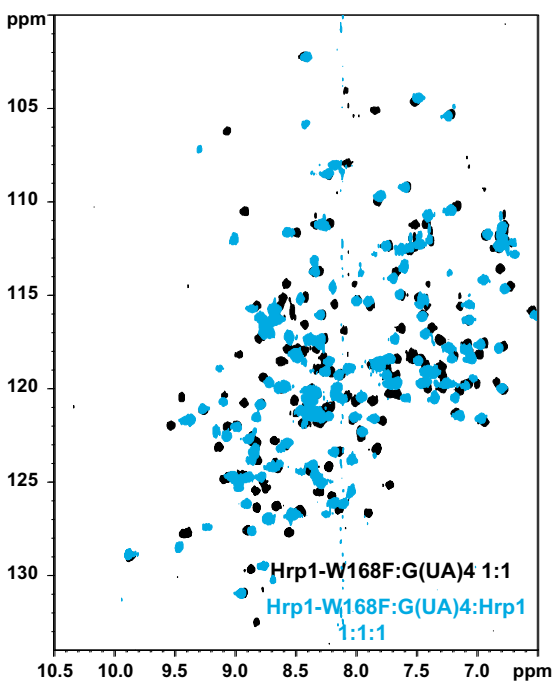

**Supplementary Figure 3** Results from the in vitro competition assays performed with Trp168 mutants. A. Comparison of the  $^{15}\text{N}$ -HSQC spectrum (red) of the equimolar ternary mixture:  $^{15}\text{N}$ -Hrp1 wt : G(UA)4 : Hrp1 Trp168Ala, with the reference spectra (in black) of Hrp1 wt in its free form (left panel) or in 1:1 complex with G(UA)4 (right panel). B. A similar comparison between the  $^{15}\text{N}$ -HSQC spectrum (cyan) of the equimolar ternary mixture: Hrp1 wt : G(UA)4 :  $^{15}\text{N}$  Hrp1 Trp168Phe, with the reference spectra of Hrp1-Trp168Phe (in black) in its free form (left panel) or in 1:1 complex with G(UA)4 (right panel).
